# Supplementary material for: A new polymorph of metacetamol
Source: Royal Society of Chemistry journal article supplement (doi:10.1039/c5ce00910c), 2015-01-01
Supplement: c5ce00910c1.pdf [file c5ce00910c1.pdf]

### Supporting Information

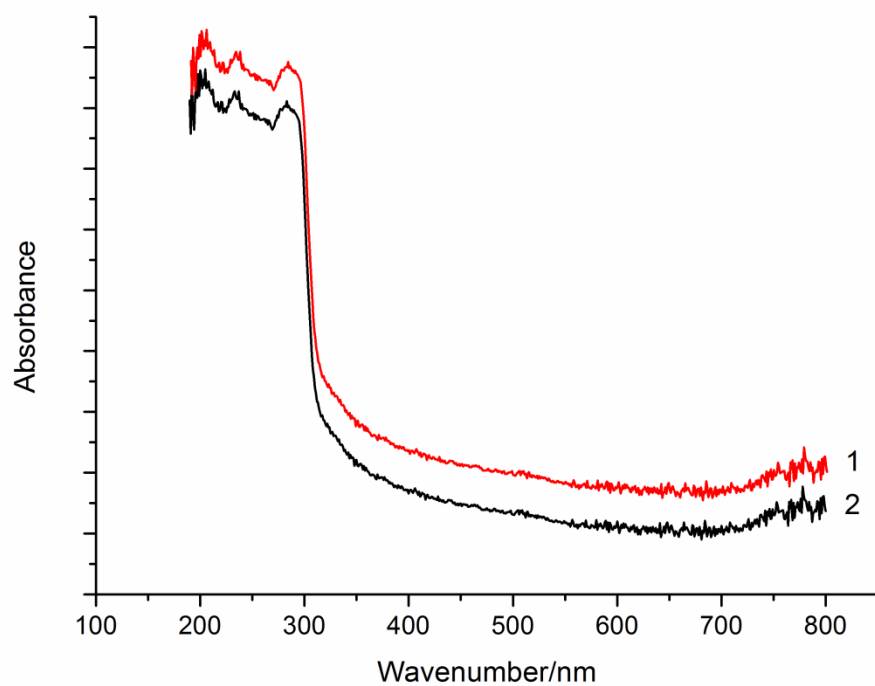

Figure S1: UV/Visible spectra showing the likeness between the form I (1) and form II (2). The plots are staggered along the y-axis for clarity.

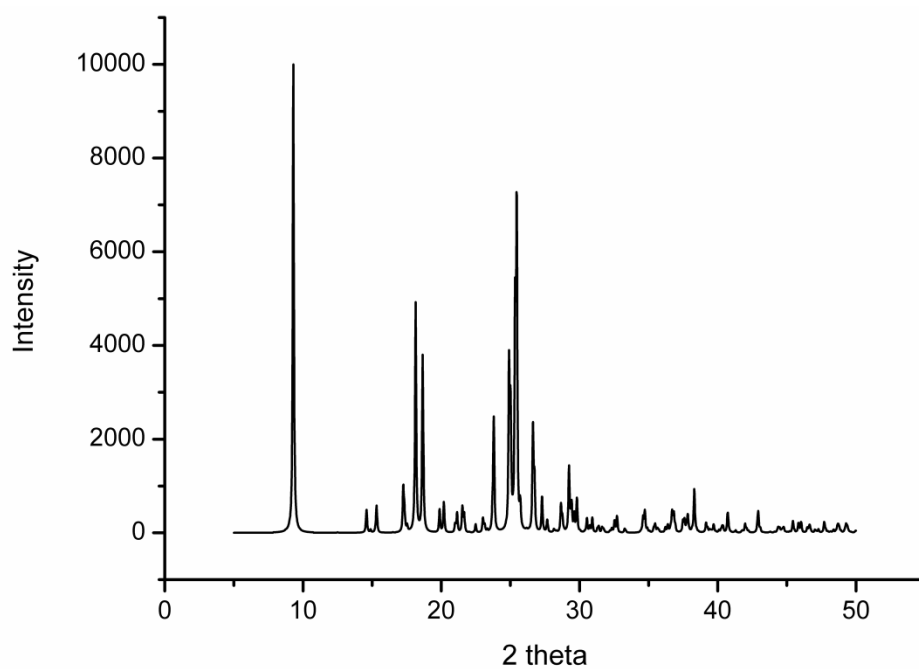

Figure S2. Theoretical powder diffraction pattern calculated from structural data file of Metacetamol II using Mercury 3.0.

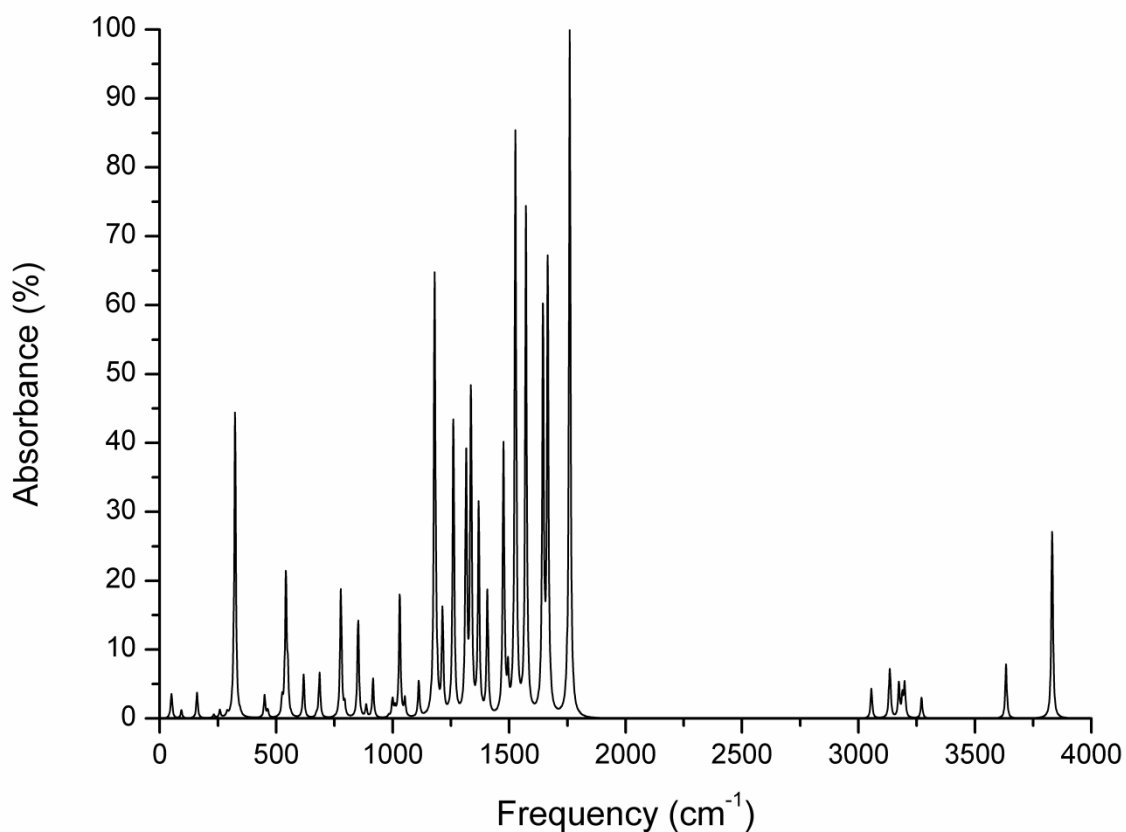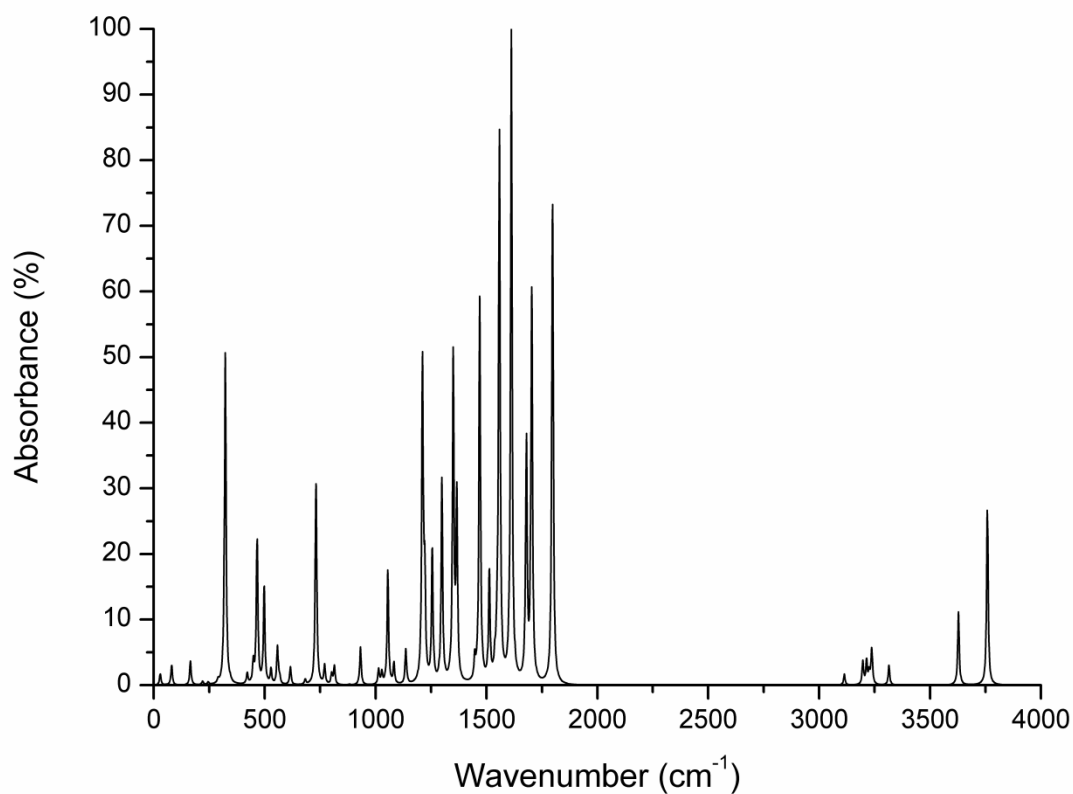

**Figure S3.** Calculated spectra for Metacetamol molecule in gas phase using B3LYP 6-31+G(d,p) (upper plot), and MP2, 6-31G(d) (lower plot) level of theories. Highest vibrational modes are assigned to the vibrations of free NH and phenyl -OH groups. Modes are  $3633\text{cm}^{-1}$  - NH,  $3831\text{cm}^{-1}$  - OH using B3LYP and  $3627\text{cm}^{-1}$  - NH,  $3758\text{cm}^{-1}$  - OH using MP2. In gas spectra -OH group that is not involved in any H-bond has higher wavenumber; this gives a strong reason to assign  $3327\text{ cm}^{-1}$  and  $3398\text{ cm}^{-1}$  bands to -NH vibration mode. Vibration modes were assigned from normal mode animation.
